# Supplementary material for: A quaternary ammonium salt [H-dabco][AcO]: as a recyclable and highly efficient catalyst for the one-pot synthesis of β-phosphonomalonates
Source: Royal Society of Chemistry journal article supplement (doi:10.1039/c5ra02743h), 2015-01-01

## SUPPORTING INFORMATION

### **A quaternary ammonium salt [H-dabco][AcO]: as a recyclable and highly efficient catalyst for the one-pot synthesis of $\beta$ -phosphonomalonates**

Ya-Qin Yu,<sup>b</sup> Da-Zhen Xu<sup>\*a</sup>

- <sup>a</sup> National Pesticide Engineering Research Center (Tianjin), Collaborative Innovation Center of Chemical Science and Engineering (Tianjin), Nankai University, Tianjin 300071, People's Republic of China  
Fax: +86 22 2350 5948; E-mail: xudazhen@nankai.edu.cn
- <sup>b</sup> Key Laboratory for Water Environment and Resources, Tianjin Normal University, Tianjin, 300387, People's Republic of China

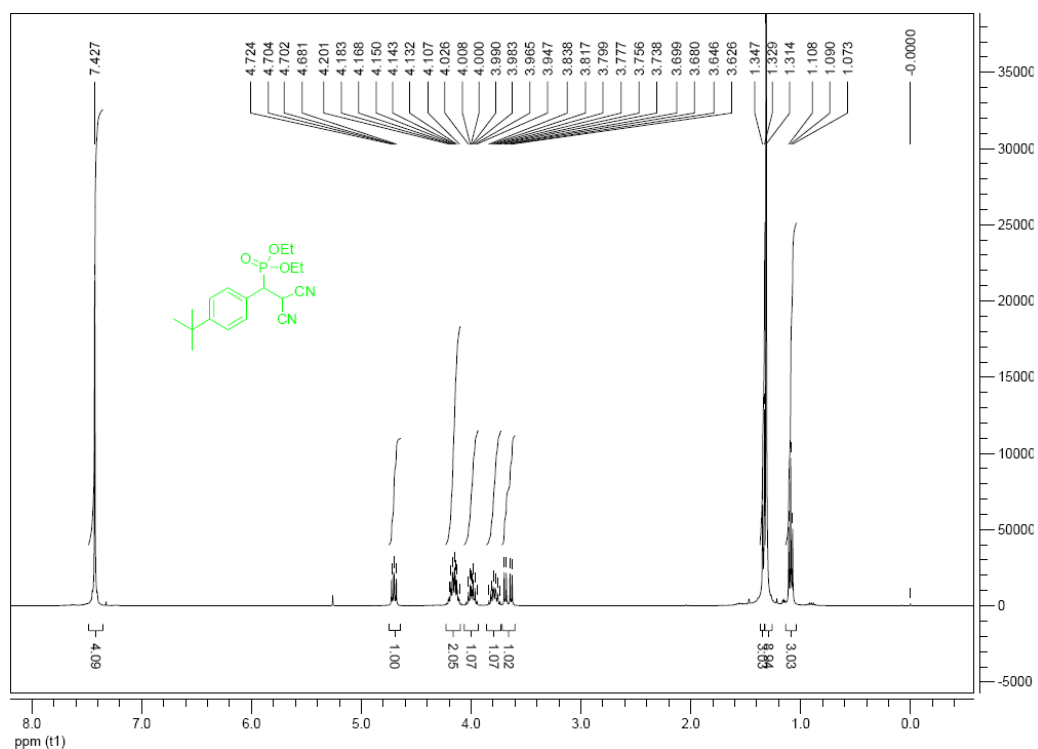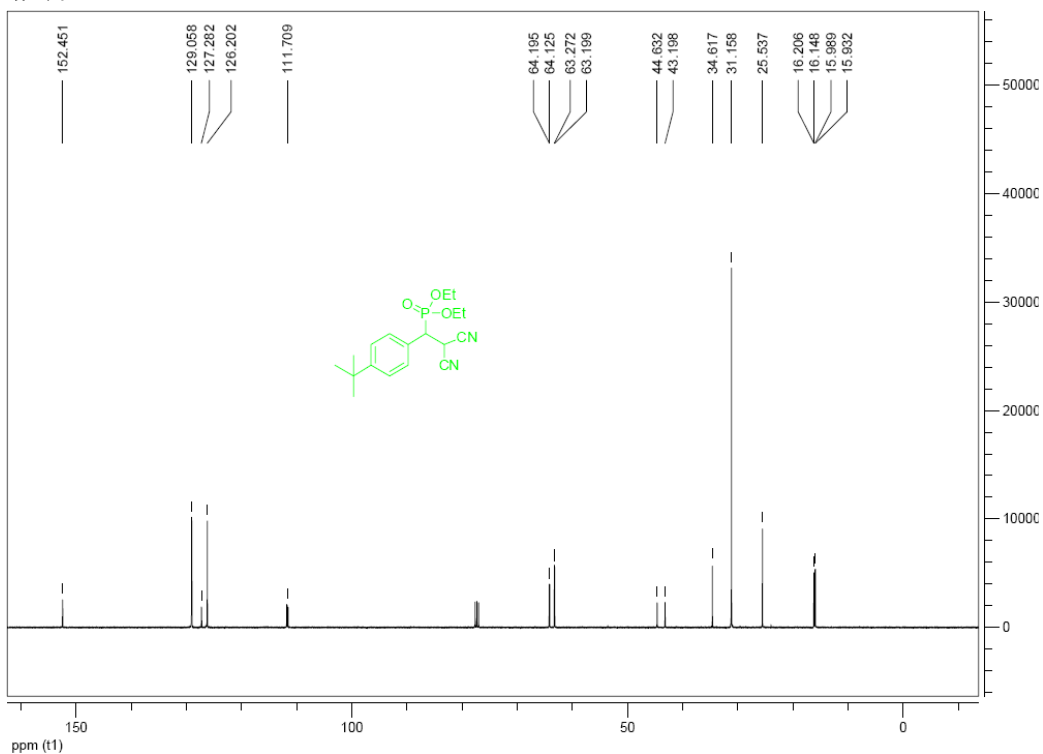

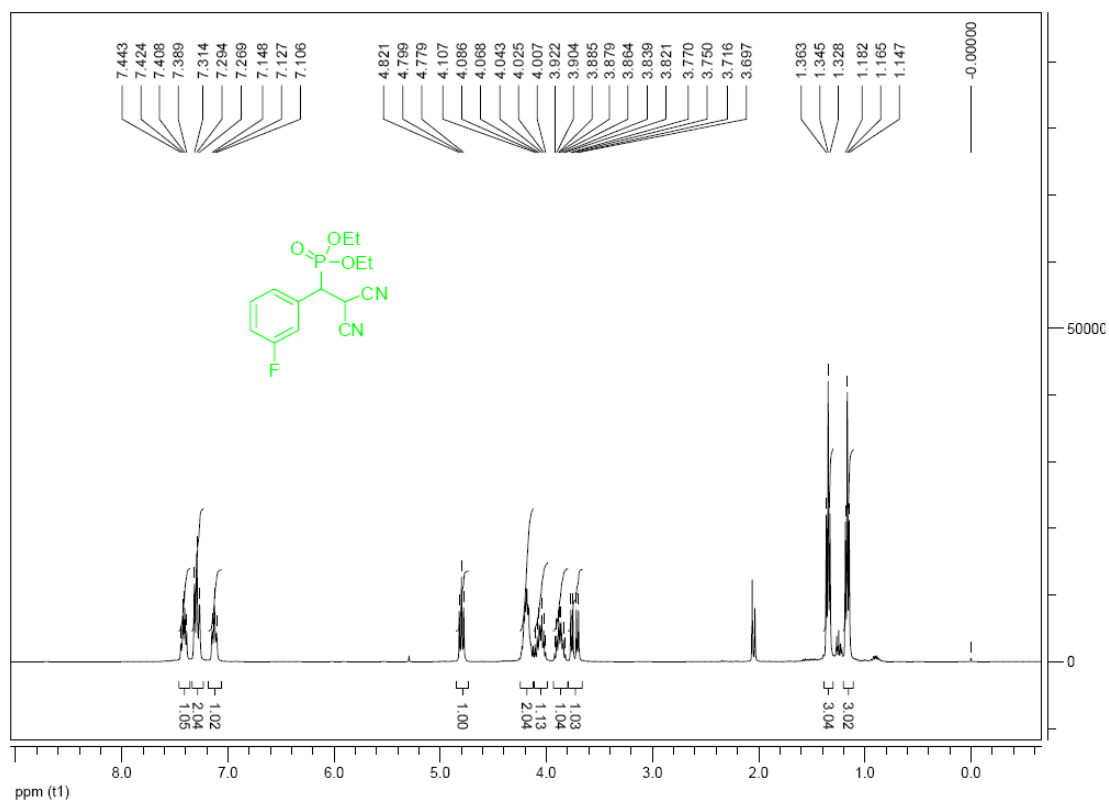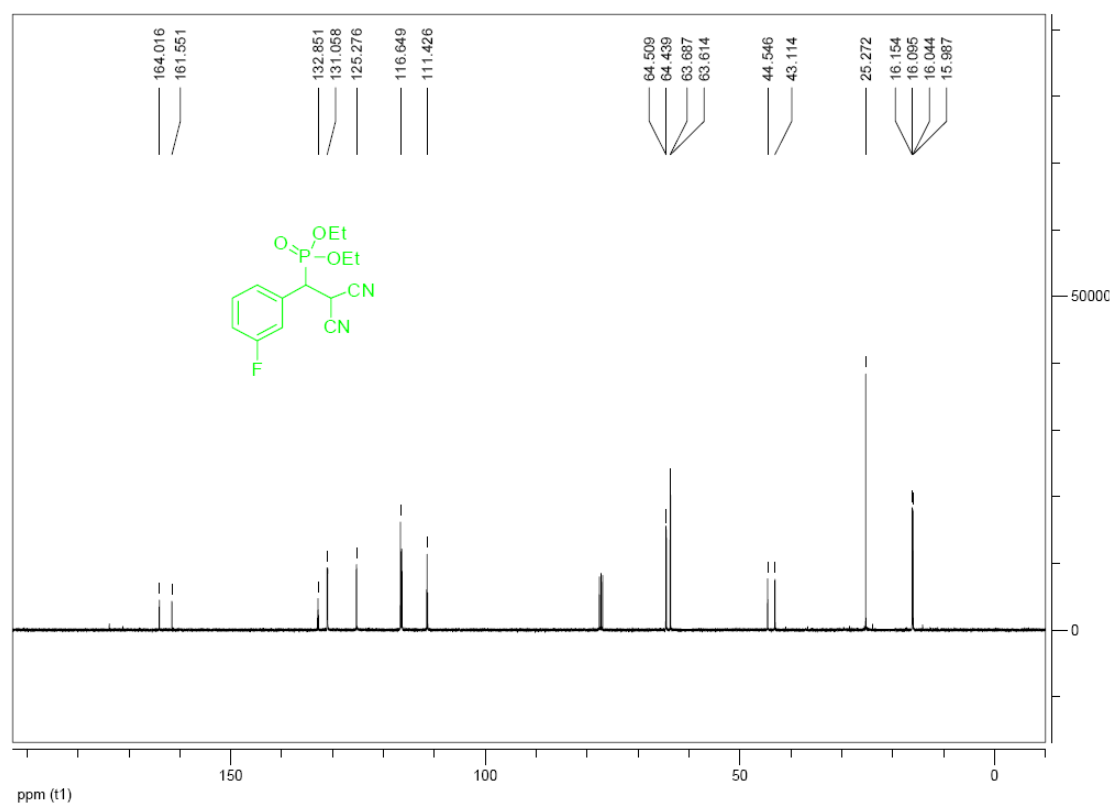

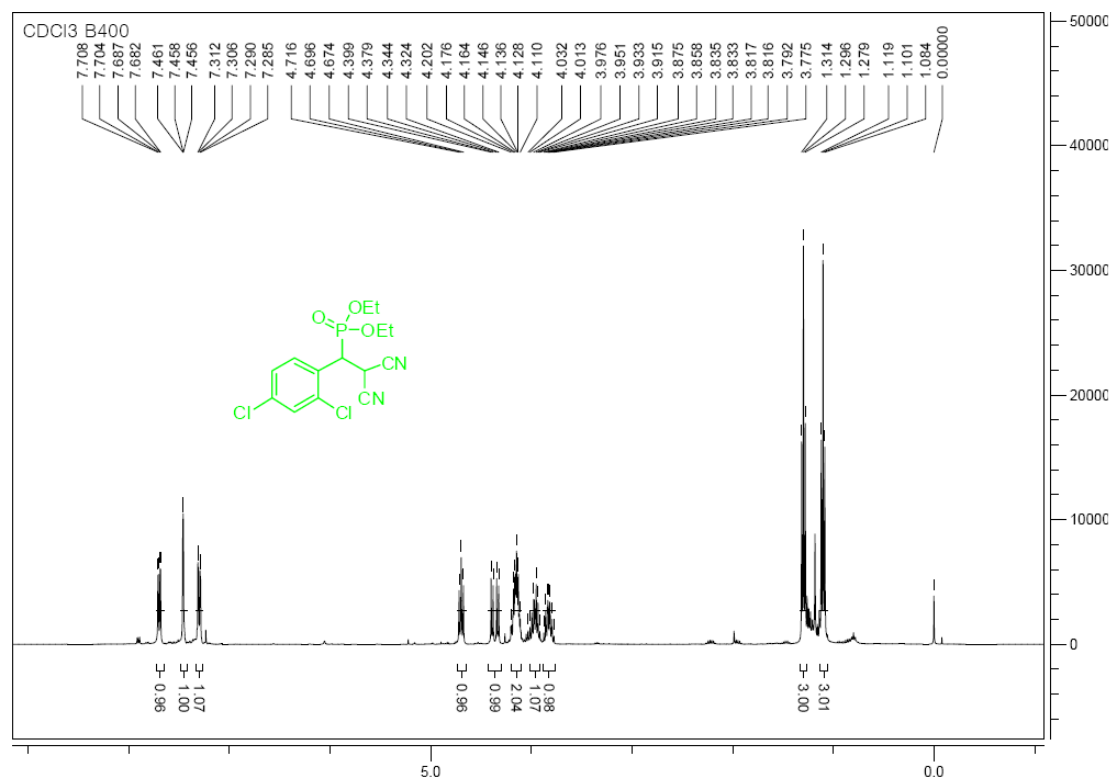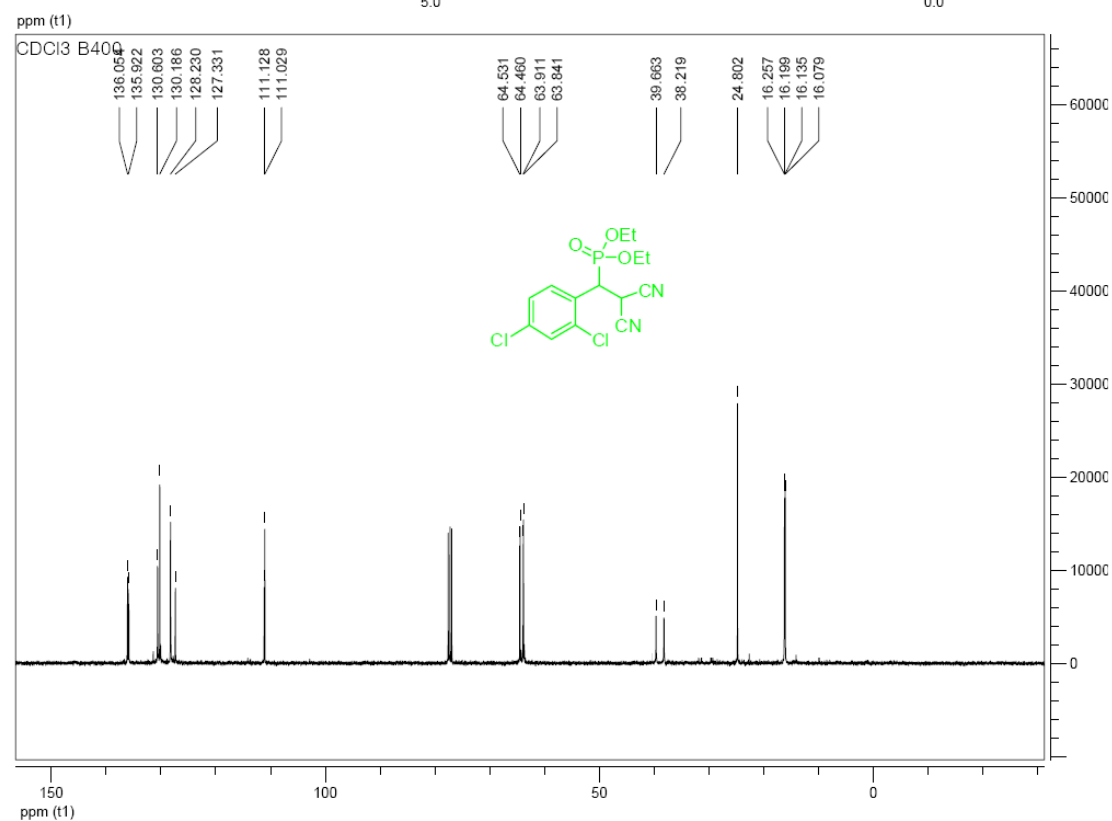

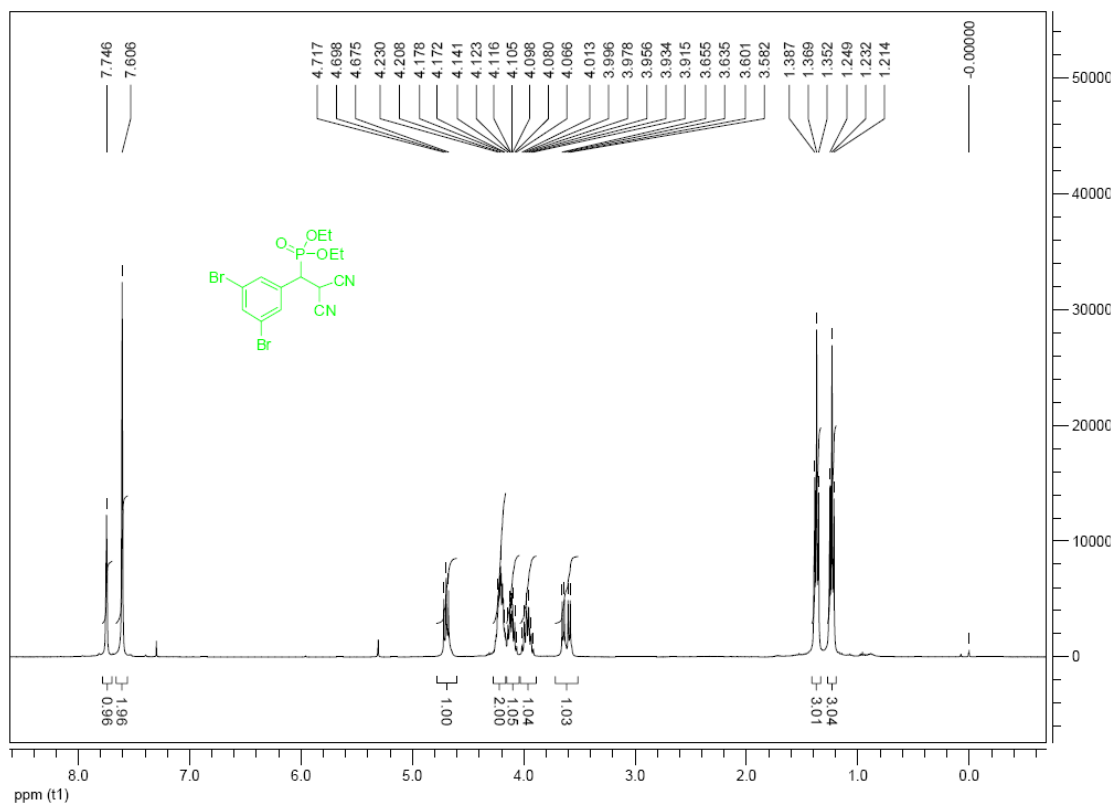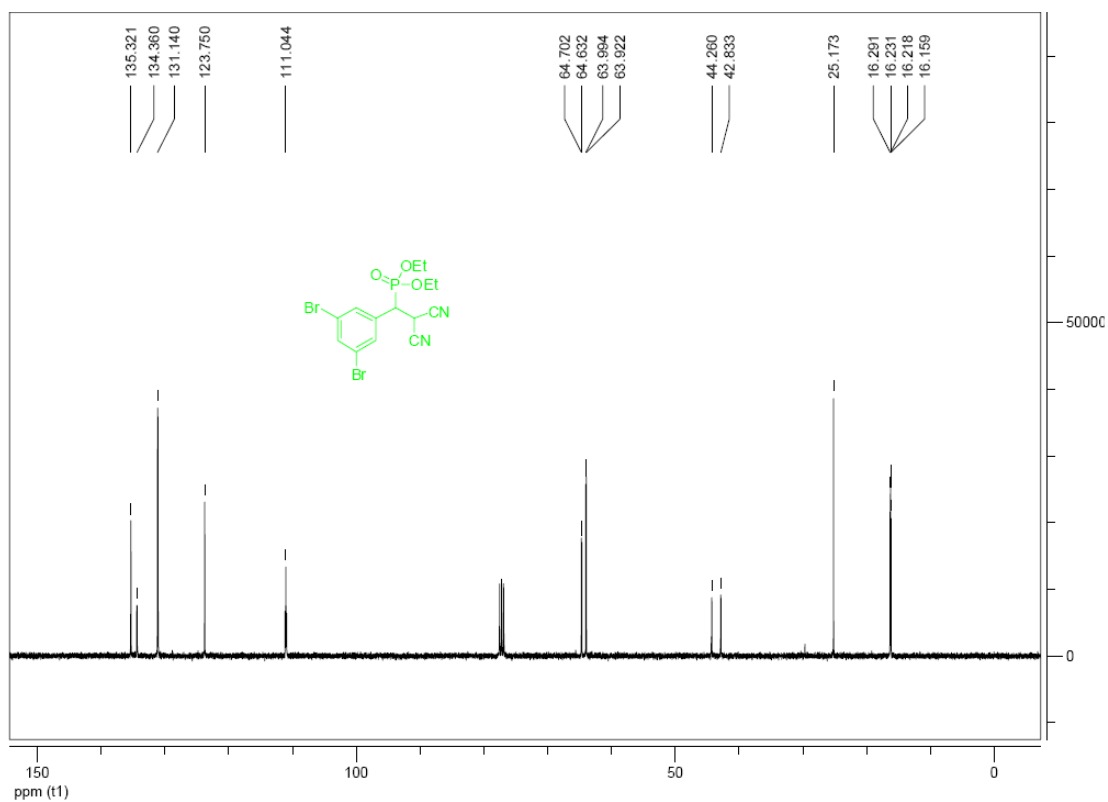

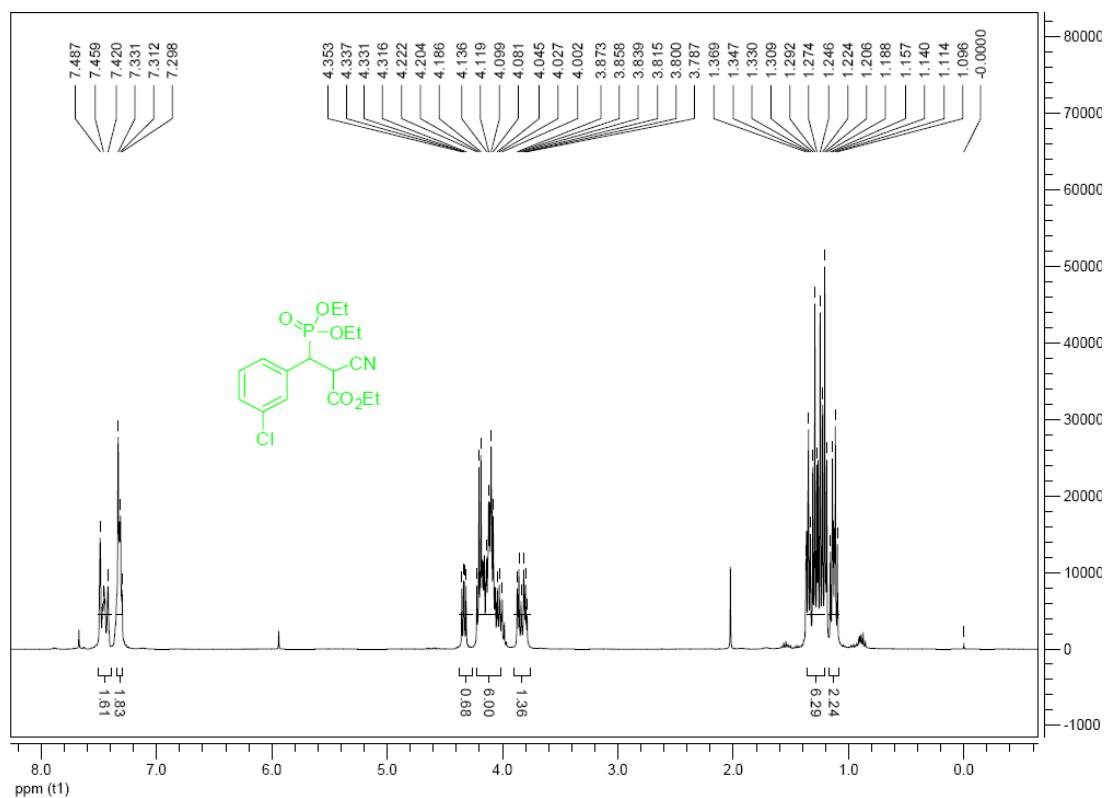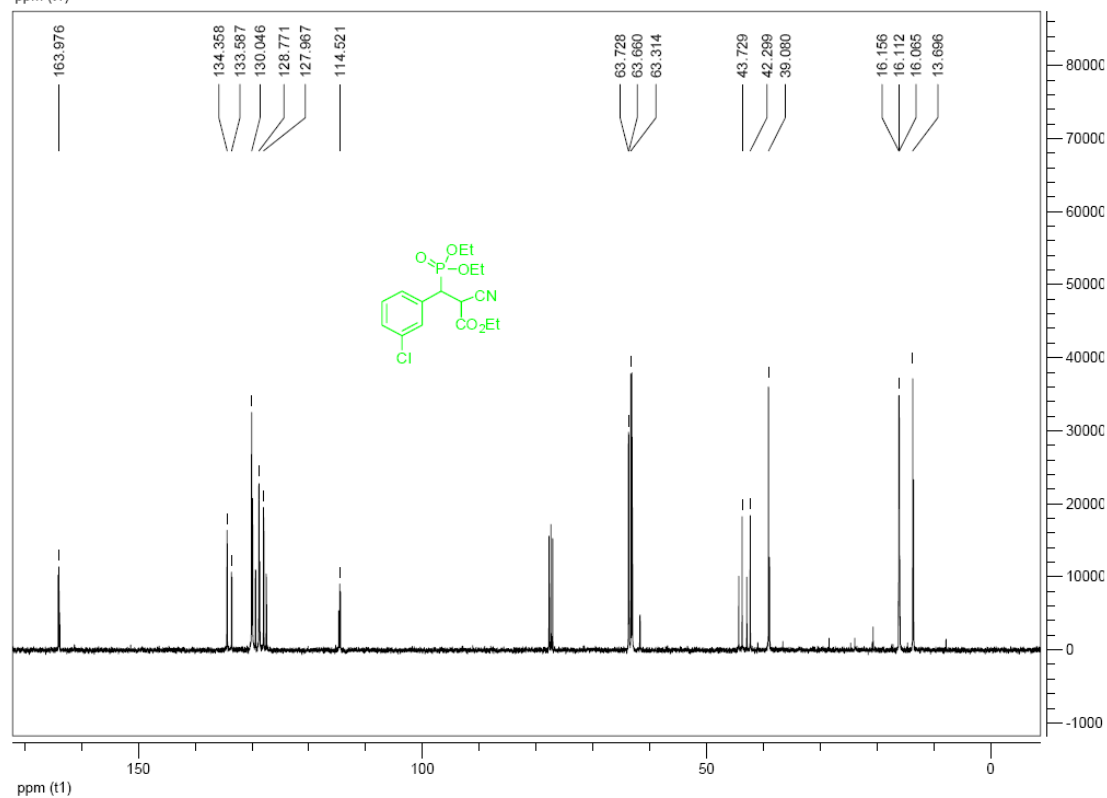

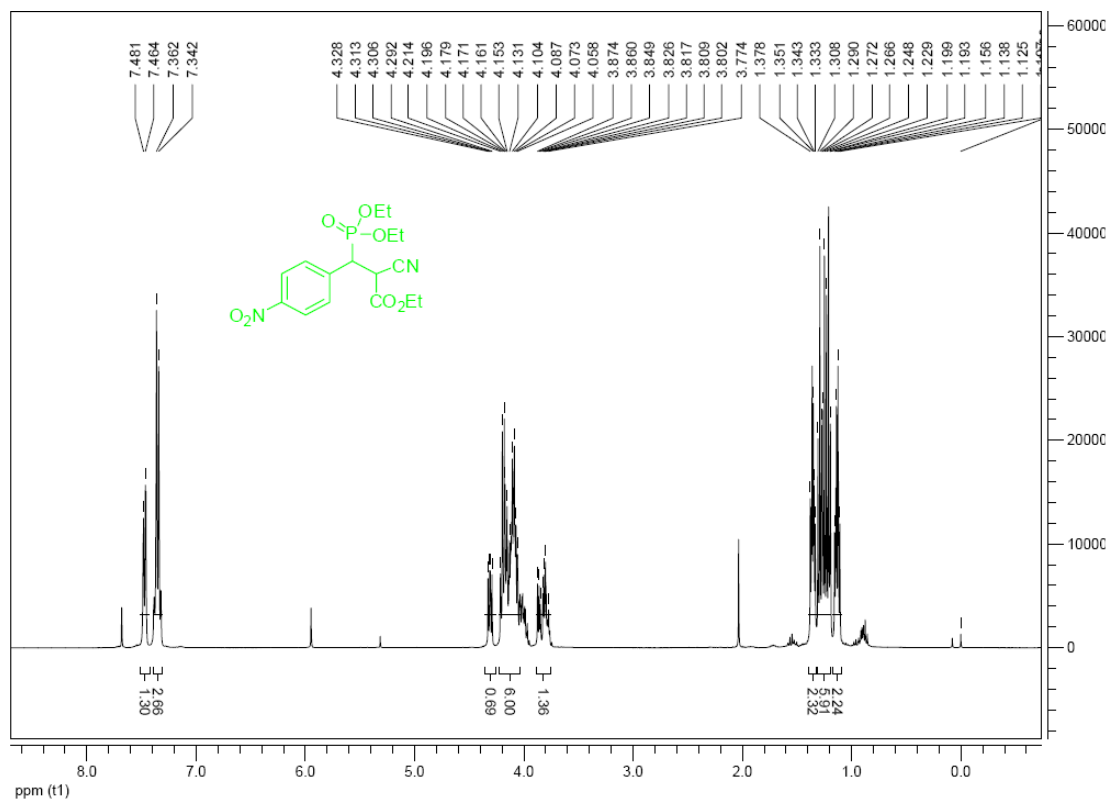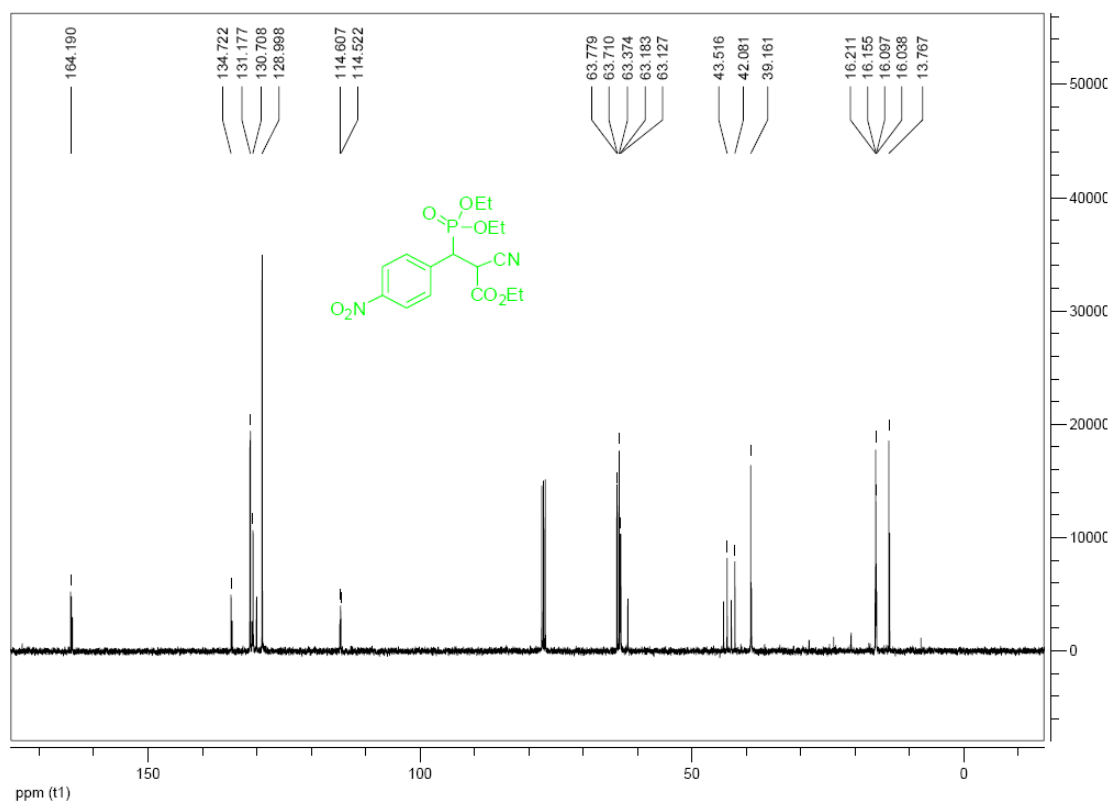

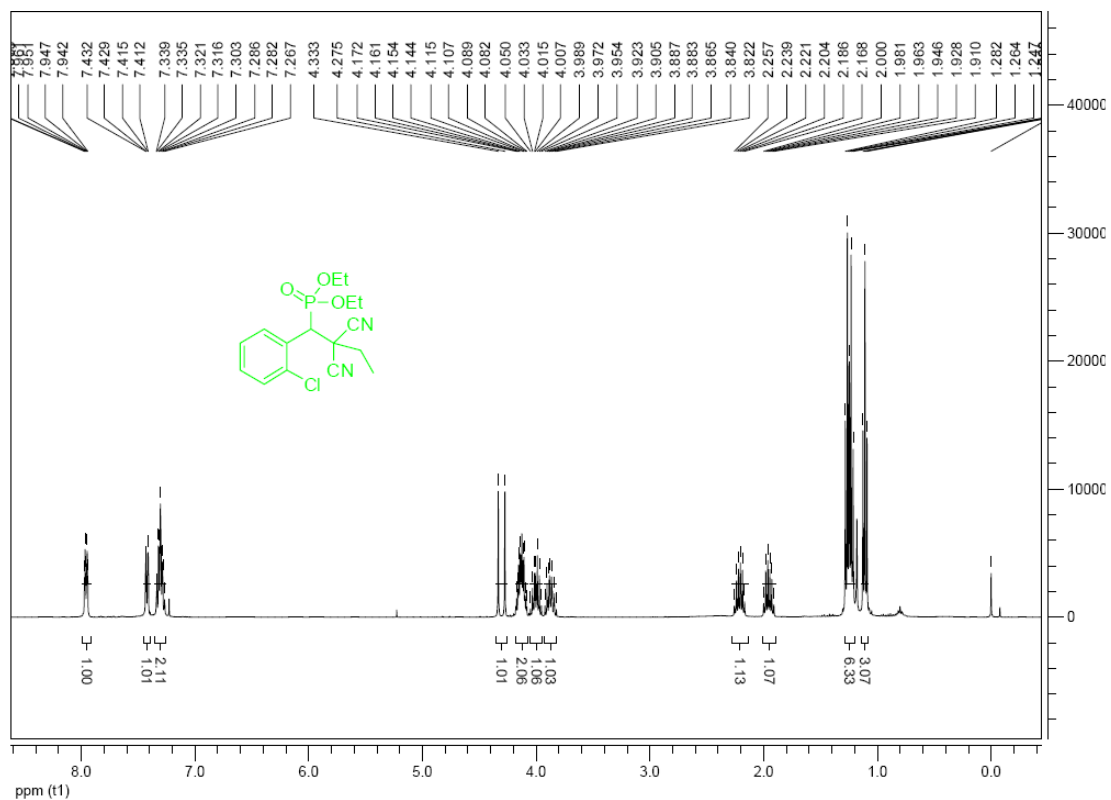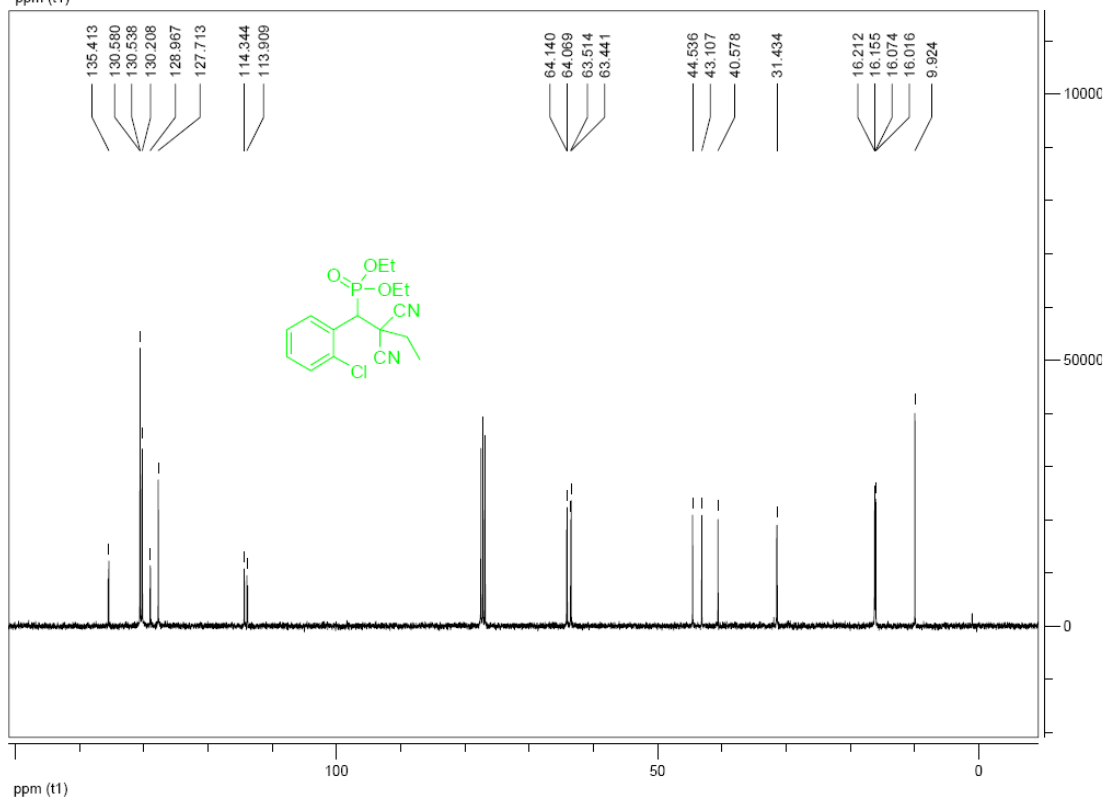

Supplement: c5ra02743h1.pdf [file c5ra02743h1.pdf]
